# Supplementary material
Source: PubMed Central journal article supplement (PMC9641827)
Supplement: 12992_2022_883_MOESM1_ESM.pdf [file 12992_2022_883_MOESM1_ESM.pdf]

**Additional File 1**

**Additional Table 1.** Emission factors for each year from 2010 to 2020.

|                                                             | 2010       | 2011       | 2012       | 2013       | 2014       | 2015       | 2016       | 2017       | 2018       | 2019       | 2020       |
|-------------------------------------------------------------|------------|------------|------------|------------|------------|------------|------------|------------|------------|------------|------------|
| <b>Electricity (tCO<sub>2</sub>e/kWh)</b>                   | 0.000473   | 0.000518   | 0.000516   | 0.000513   | 0.000497   | 0.000486   | 0.000485   | 0.000476   | 0.000458   | 0.000431   | 0.000406   |
| <b>Gas (tCO<sub>2</sub>e/Nm<sup>3</sup>)</b>                | 0.000223   | 0.000223   | 0.000223   | 0.000223   | 0.000223   | 0.000223   | 0.000223   | 0.000223   | 0.000223   | 0.000223   | 0.000223   |
| <b>Clean water (tCO<sub>2</sub>e/m<sup>3</sup>)</b>         | 0.00013    | 0.000147   | 0.000146   | 0.000143   | 0.000139   | 0.000135   | 0.000137   | 0.000135   | 0.000132   | 0.000127   | 0.000122   |
| <b>Sewage (tCO<sub>2</sub>e/m<sup>3</sup>)</b>              | 0.000293   | 0.000302   | 0.000287   | 0.000307   | 0.000291   | 0.00027    | 0.000302   | 0.000292   | 0.000295   | 0.000287   | 0.000272   |
| <b>Solid waste (tCO<sub>2</sub>e/kg)</b>                    | NA         | NA         | NA         | NA         | 0.0008214  | 0.0008214  | 0.0008214  | 0.0008214  | 0.0008214  | 0.0008214  | 0.0008214  |
| <b>Scrap metal (tCO<sub>2</sub>e/kg)</b>                    | NA         | NA         | NA         | NA         | 0.0000122  | 0.0000122  | 0.0000122  | 0.0000122  | 0.0000122  | 0.0000122  | 0.0000122  |
| <b>Medical waste (infectious) (tCO<sub>2</sub>e/kg)</b>     | NA         | NA         | NA         | NA         | 0.00255    | 0.00255    | 0.00255    | 0.00255    | 0.00255    | 0.00255    | 0.00255    |
| <b>Medical waste (non-infectious) (tCO<sub>2</sub>e/kg)</b> | NA         | NA         | NA         | NA         | 0.00255    | 0.00255    | 0.00255    | 0.00255    | 0.00255    | 0.00255    | 0.00255    |
| <b>Pharmaceuticals (tCO<sub>2</sub>e/Yen)</b>               | 0.00000283 | 0.00000283 | 0.00000283 | 0.00000283 | 0.00000283 | 0.00000283 | 0.00000283 | 0.00000283 | 0.00000283 | 0.00000283 | 0.00000283 |
| <b>Medical supplies (tCO<sub>2</sub>e/Yen)</b>              | 0.00000329 | 0.00000329 | 0.00000329 | 0.00000329 | 0.00000329 | 0.00000329 | 0.00000329 | 0.00000329 | 0.00000329 | 0.00000329 | 0.00000329 |

Note: kg: kilogram; kWh: kilowatt; NA: Not available; tCO<sub>2</sub>e: tonnes of carbon dioxide equivalent.

References for emission factors:

Electricity: The Chubu Electric Power's website ([https://miraiz.chuden.co.jp/info/topics/\\_icsFiles/afieldfile/2020/09/16/topics\\_att\\_20200916\\_01.pdf.pdf](https://miraiz.chuden.co.jp/info/topics/_icsFiles/afieldfile/2020/09/16/topics_att_20200916_01.pdf.pdf)). For an emission factor in 2020, ([https://miraiz.chuden.co.jp/info/topics/1206545\\_1939.html](https://miraiz.chuden.co.jp/info/topics/1206545_1939.html)).

Gas: [https://ghg-santeikohyo.env.go.jp/files/calc/itiran\\_2020\\_rev.pdf](https://ghg-santeikohyo.env.go.jp/files/calc/itiran_2020_rev.pdf)

Clean water and sewage: Answered by the Nagoya City Waterworks & Sewerage Bureau.

Solid waste, scrap metal, pharmaceuticals, and medical supplies: [https://www.env.go.jp/earth/ondanka/supply\\_chain/gvc/estimate\\_tool.html#no07](https://www.env.go.jp/earth/ondanka/supply_chain/gvc/estimate_tool.html#no07)

Medical waste (both infectious and non-infectious): [https://www.env.go.jp/earth/ondanka/suishin\\_g/3rd\\_edition/ref2.pdf](https://www.env.go.jp/earth/ondanka/suishin_g/3rd_edition/ref2.pdf)

**Additional Table 2.** Carbon emission sources for each year between 2010 and 2020 (values are the median of 12 monthly values in a year, with the interquartile range in parentheses).

|                                                                         | 2010                                      | 2011                                      | 2012                                      | 2013                                      | 2014                                      |
|-------------------------------------------------------------------------|-------------------------------------------|-------------------------------------------|-------------------------------------------|-------------------------------------------|-------------------------------------------|
| <b>Gas, (m<sup>3</sup>)</b>                                             | 189,142·00 [174,571·00, 231,952·25]       | 182,888·50 [145,141·00, 209,253·25]       | 178,008·00 [153,299·75, 194,791·50]       | 172,378·50 [150,541·25, 207,928·25]       | 174,292·50 [141,698·50, 200,211·50]       |
| <b>Emission from gas, (tCO<sub>2</sub>e)</b>                            | 421·79 [389·29, 517·25]                   | 407·84 [323·66, 466·63]                   | 396·96 [341·86, 434·39]                   | 384·40 [335·71, 463·68]                   | 388·67 [315·99, 446·47]                   |
| <b>Electricity, (kWh)</b>                                               | 3,544,415·50 [3,391,485·00, 4,054,412·00] | 3,435,184·50 [3,331,413·50, 3,890,282·50] | 3,470,566·00 [3,287,747·00, 3,719,727·25] | 3,526,377·00 [3,365,848·00, 3,889,756·25] | 3,577,543·50 [3,459,199·00, 3,924,728·75] |
| <b>Emission from electricity, (tCO<sub>2</sub>e)</b>                    | 1,676·51 [1,604·17, 1,917·74]             | 1,779·43 [1,725·67, 2,015·17]             | 1,790·81 [1,696·48, 1,919·38]             | 1,809·03 [1,726·68, 1,995·44]             | 1,778·04 [1,719·22, 1,950·59]             |
| <b>Clean water, (m<sup>3</sup>)</b>                                     | 23,397·00 [21,923·00, 24,667·00]          | 23,414·00 [20,368·00, 26,292·00]          | 21,208·00 [19,331·00, 25,248·00]          | 19,303·50 [18,011·00, 23,696·00]          | 17,901·50 [17,326·00, 23,583·00]          |
| <b>Emission from clean water, (tCO<sub>2</sub>e)</b>                    | 3·04 [2·85, 3·21]                         | 3·44 [2·99, 3·86]                         | 3·10 [2·82, 3·69]                         | 2·76 [2·58, 3·39]                         | 2·49 [2·41, 3·28]                         |
| <b>Sewage, (m<sup>3</sup>)</b>                                          | 39,860·00 [35,341·00, 42,226·00]          | 36,087·00 [33,532·00, 39,230·00]          | 31,735·00 [28,453·00, 35,137·00]          | 30,904·50 [29,410·00, 34,536·00]          | 29,222·50 [28,728·00, 35,585·00]          |
| <b>Emission from sewage, (tCO<sub>2</sub>e)</b>                         | 11·68 [10·35, 12·37]                      | 10·90 [10·13, 11·85]                      | 9·11 [8·17, 10·08]                        | 9·49 [9·03, 10·60]                        | 8·50 [8·36, 10·36]                        |
| <b>Emission from medicine, (tCO<sub>2</sub>e)</b>                       | 2,437·40 [2,437·40, 2,437·40]             | 2,798·95 [2,798·95, 2,798·95]             | 3,018·22 [3,018·22, 3,018·22]             | 3,307·55 [3,307·55, 3,307·55]             | 3,528·61 [3,528·61, 3,528·61]             |
| <b>Solid waste, (kg)</b>                                                | NA                                        | NA                                        | NA                                        | NA                                        | 46,976·00 [44,608·75, 48,179·00]          |
| <b>Emission from solid waste, (tCO<sub>2</sub>e)</b>                    | NA                                        | NA                                        | NA                                        | NA                                        | 38·59 [36·64, 39·57]                      |
| <b>Scrap metal, (kg)</b>                                                | NA                                        | NA                                        | NA                                        | NA                                        | 530·00 [520·00, 620·00]                   |
| <b>Emission from scrap metal, (tCO<sub>2</sub>e)</b>                    | NA                                        | NA                                        | NA                                        | NA                                        | 0·01 [0·01, 0·01]                         |
| <b>Medical waste (infectious), (kg)</b>                                 | NA                                        | NA                                        | NA                                        | NA                                        | 38,334·00 [36,829·75, 39,703·75]          |
| <b>Emission from medical waste (infectious), (tCO<sub>2</sub>e)</b>     | NA                                        | NA                                        | NA                                        | NA                                        | 97·75 [93·92, 101·24]                     |
| <b>Medical waste (non-infectious), (kg)</b>                             | NA                                        | NA                                        | NA                                        | NA                                        | 11,660·00 [11,087·50, 12,110·00]          |
| <b>Emission from medical waste (non-infectious), (tCO<sub>2</sub>e)</b> | NA                                        | NA                                        | NA                                        | NA                                        | 29·73 [28·27, 30·88]                      |
| <b>Scope 1, (tCO<sub>2</sub>e)</b>                                      | 421·79 [389·29, 517·25]                   | 407·84 [323·66, 466·63]                   | 396·96 [341·86, 434·39]                   | 384·40 [335·71, 463·68]                   | 388·67 [315·99, 446·47]                   |
| <b>Scope 2, (tCO<sub>2</sub>e)</b>                                      | 1,676·51 [1,604·17, 1,917·74]             | 1,779·43 [1,725·67, 2,015·17]             | 1,790·81 [1,696·48, 1,919·38]             | 1,809·03 [1,726·68, 1,995·44]             | 1,778·04 [1,719·22, 1,950·59]             |

|                                                   |                               |                               |                               |                               |                               |
|---------------------------------------------------|-------------------------------|-------------------------------|-------------------------------|-------------------------------|-------------------------------|
| <b>Scope 3 without waste, (tCO<sub>2</sub>e)</b>  | 2,452.09 [2,450.66, 2,452.98] | 2,813.17 [2,812.07, 2,814.61] | 3,030.42 [3,029.20, 3,031.99] | 3,319.70 [3,319.10, 3,321.54] | 3,539.58 [3,539.40, 3,542.24] |
| <b>Scope 3 with waste, (tCO<sub>2</sub>e)</b>     | NA                            | NA                            | NA                            | NA                            | 3704.60 [3701.06, 3711.31]    |
| <b>Emission without waste, (tCO<sub>2</sub>e)</b> | 4,571.77 [4,498.01, 4,833.19] | 5,066.30 [4,924.75, 5,203.18] | 5,208.93 [5,162.56, 5,442.37] | 5,547.94 [5,471.65, 5,718.49] | 5,729.66 [5,626.97, 5,849.74] |
| <b>Emission with waste, (tCO<sub>2</sub>e)</b>    | NA                            | NA                            | NA                            | NA                            | 5,910.61 [5,781.36, 6,011.71] |
| <b>Average monthly temperature, (°C)</b>          | 16.00 [7.80, 24.45]           | 16.35 [7.90, 24.12]           | 16.60 [9.20, 23.18]           | 16.60 [8.58, 23.93]           | 16.75 [8.70, 23.55]           |

|                                                      | <b>2015</b>                               | <b>2016</b>                               | <b>2017</b>                               | <b>2018</b>                               | <b>2019</b>                               | <b>2020</b>                               | <b>p</b>       |
|------------------------------------------------------|-------------------------------------------|-------------------------------------------|-------------------------------------------|-------------------------------------------|-------------------------------------------|-------------------------------------------|----------------|
| <b>Gas, (m<sup>3</sup>)</b>                          | 159,791.00 [129,491.75, 184,504.00]       | 171,611.50 [157,966.75, 206,460.75]       | 155,943.50 [131,526.50, 205,045.25]       | 173,122.00 [148,836.25, 211,692.75]       | 164,967.00 [129,572.50, 191,875.25]       | 163,675.50 [132,427.00, 188,383.75]       | 0.5<br>70      |
| <b>Emission from gas, (tCO<sub>2</sub>e)</b>         | 356.33 [288.77, 411.44]                   | 382.69 [352.27, 460.41]                   | 347.75 [293.30, 457.25]                   | 386.06 [331.90, 472.07]                   | 367.88 [288.95, 427.88]                   | 365.00 [295.31, 420.10]                   | 0.5<br>70      |
| <b>Electricity, (kWh)</b>                            | 3,546,714.50 [3,428,474.75, 3,861,134.00] | 3,605,080.00 [3,449,287.00, 3,966,512.75] | 3,767,851.50 [3,664,384.00, 3,941,978.75] | 3,811,958.50 [3,637,235.75, 4,115,118.50] | 3,760,401.50 [3,638,998.50, 4,187,604.25] | 3,832,045.00 [3,634,811.25, 4,206,047.50] | 0.1<br>78      |
| <b>Emission from electricity, (tCO<sub>2</sub>e)</b> | 1,723.70 [1,666.24, 1,876.51]             | 1,748.46 [1,672.90, 1,923.76]             | 1,793.50 [1,744.25, 1,876.38]             | 1,745.88 [1,665.85, 1,884.72]             | 1,620.73 [1,568.41, 1,804.86]             | 1,555.81 [1,475.73, 1,707.66]             | 0.0<br>24      |
| <b>Clean water, (m<sup>3</sup>)</b>                  | 19,897.00 [19,130.00, 23,140.00]          | 20,132.50 [17,819.00, 22,319.00]          | 19,130.00 [18,823.00, 22,796.00]          | 22,288.50 [21,042.00, 24,970.00]          | 23,004.50 [21,291.00, 27,745.00]          | 19,371.00 [18,193.00, 23,871.00]          | 0.0<br>01      |
| <b>Emission from clean water, (tCO<sub>2</sub>e)</b> | 2.69 [2.58, 3.12]                         | 2.76 [2.44, 3.06]                         | 2.58 [2.54, 3.08]                         | 2.94 [2.78, 3.30]                         | 2.92 [2.70, 3.52]                         | 2.36 [2.22, 2.91]                         | <<br>0.0<br>01 |
| <b>Sewage, (m<sup>3</sup>)</b>                       | 31,622.00 [29,614.00, 35,142.00]          | 32,511.50 [28,628.00, 34,442.00]          | 31,313.50 [30,116.00, 34,361.00]          | 33,817.50 [32,674.00, 38,376.00]          | 32,179.50 [29,782.00, 39,306.00]          | 29,321.00 [28,259.00, 33,654.00]          | <<br>0.0<br>01 |
| <b>Emission from sewage, (tCO<sub>2</sub>e)</b>      | 8.54 [8.00, 9.49]                         | 9.82 [8.65, 10.40]                        | 9.14 [8.79, 10.03]                        | 9.98 [9.64, 11.32]                        | 9.24 [8.55, 11.28]                        | 7.98 [7.69, 9.15]                         | <<br>0.0<br>01 |
| <b>Emission from medicine, (tCO<sub>2</sub>e)</b>    | 3,592.69 [3,592.69, 3,592.69]             | 3,604.80 [3,604.80, 3,604.80]             | 3,637.42 [3,637.42, 3,637.42]             | 3,743.86 [3,743.86, 3,743.86]             | 4,019.37 [4,019.37, 4,019.37]             | 3,940.52 [3,940.52, 3,940.52]             | <<br>0.0<br>01 |
| <b>Solid waste, (kg)</b>                             | 45,878.50 [43,419.50, 47,368.00]          | 46,044.00 [44,653.25, 46,718.50]          | 46,321.50 [44,247.00, 47,387.75]          | 47,409.00 [46,490.25, 48,832.00]          | 46,219.50 [43,784.25, 47,937.50]          | 42,379.00 [40,210.25, 44,453.25]          | 0.0<br>11      |
| <b>Emission from solid waste, (tCO<sub>2</sub>e)</b> | 37.68 [35.66, 38.91]                      | 37.82 [36.68, 38.37]                      | 38.05 [36.34, 38.92]                      | 38.94 [38.19, 40.11]                      | 37.96 [35.96, 39.38]                      | 34.81 [33.03, 36.51]                      | 0.0<br>11      |

|                                                                         |                                  |                                  |                                  |                                  |                                  |                                  |         |
|-------------------------------------------------------------------------|----------------------------------|----------------------------------|----------------------------------|----------------------------------|----------------------------------|----------------------------------|---------|
| <b>Scrap metal, (kg)</b>                                                | 540·00 [497·50, 652·50]          | 495·00 [475·00, 560·00]          | 520·00 [460·00, 580·00]          | 470·00 [440·00, 530·00]          | 440·00 [407·50, 480·00]          | 400·00 [352·50, 427·50]          | < 0·001 |
| <b>Emission from scrap metal, (tCO<sub>2</sub>e)</b>                    | 0·01 [0·01, 0·01]                | 0·01 [0·01, 0·01]                | 0·01 [0·01, 0·01]                | 0·01 [0·01, 0·01]                | 0·01 [0·00, 0·01]                | 0·00 [0·00, 0·01]                | < 0·001 |
| <b>Medical waste (infectious), (kg)</b>                                 | 41,742·50 [39,682·75, 43,595·75] | 41,178·50 [40,695·00, 42,960·50] | 41,280·00 [40,495·00, 42,717·50] | 43,665·00 [42,175·00, 45,977·50] | 44,890·00 [42,332·50, 46,235·00] | 57,890·00 [55,120·00, 59,150·00] | < 0·001 |
| <b>Emission from medical waste (infectious), (tCO<sub>2</sub>e)</b>     | 106·44 [101·19, 111·17]          | 105·01 [103·77, 109·55]          | 105·26 [103·26, 108·93]          | 111·35 [107·55, 117·24]          | 114·47 [107·95, 117·90]          | 147·62 [140·56, 150·83]          | < 0·001 |
| <b>Medical waste (non-infectious), (kg)</b>                             | 11,457·00 [10,930·00, 12,002·50] | 10,690·00 [10,235·00, 10,862·50] | 10,195·00 [9,420·00, 10,472·50]  | 10,825·00 [10,510·00, 11,070·00] | 9,290·00 [9,052·50, 9,955·00]    | 9,505·00 [8,780·00, 10,595·00]   | < 0·001 |
| <b>Emission from medical waste (non-infectious), (tCO<sub>2</sub>e)</b> | 29·22 [27·87, 30·61]             | 27·26 [26·10, 27·70]             | 26·00 [24·02, 26·70]             | 27·60 [26·80, 28·23]             | 23·69 [23·08, 25·39]             | 24·24 [22·39, 27·02]             | < 0·001 |
| <b>Scope 1, (tCO<sub>2</sub>e)</b>                                      | 356·33 [288·77, 411·44]          | 382·69 [352·27, 460·41]          | 347·75 [293·30, 457·25]          | 386·06 [331·90, 472·07]          | 367·88 [288·95, 427·88]          | 365·00 [295·31, 420·10]          | 0·570   |
| <b>Scope 2, (tCO<sub>2</sub>e)</b>                                      | 1,723·70 [1,666·24, 1,876·51]    | 1,748·46 [1,672·90, 1,923·76]    | 1,793·50 [1,744·25, 1,876·38]    | 1,745·88 [1,665·85, 1,884·72]    | 1,620·73 [1,568·41, 1,804·86]    | 1,555·81 [1,475·73, 1,707·66]    | 0·024   |
| <b>Scope 3 without waste, (tCO<sub>2</sub>e)</b>                        | 3,603·91 [3,603·27, 3,605·30]    | 3,617·38 [3,615·84, 3,618·26]    | 3,649·11 [3,648·77, 3,650·53]    | 3,756·78 [3,756·15, 3,758·48]    | 4,031·52 [4,030·64, 4,034·17]    | 3,950·80 [3,950·53, 3,952·58]    | < 0·001 |
| <b>Scope 3 with waste, (tCO<sub>2</sub>e)</b>                           | 3,779·23 [3,768·46, 3,786·33]    | 3,789·57 [3,785·05, 3,791·15]    | 3,817·30 [3,814·88, 3,825·85]    | 3,936·35 [3,926·97, 3,942·05]    | 4,206·52 [4,200·88, 4,214·15]    | 4,157·07 [4,154·17, 4,160·05]    | < 0·001 |
| <b>Emission without waste, (tCO<sub>2</sub>e)</b>                       | 5,714·69 [5,654·98, 5,796·50]    | 5,756·48 [5,693·77, 5,928·51]    | 5,838·56 [5,724·26, 5,933·23]    | 5,885·67 [5,778·91, 6,017·09]    | 6,029·14 [5,971·20, 6,128·39]    | 5,855·63 [5,774·43, 6,082·18]    | < 0·001 |
| <b>Emission with waste, (tCO<sub>2</sub>e)</b>                          | 5,889·88 [5,826·59, 5,968·39]    | 5,924·88 [5,862·87, 6,099·16]    | 6,010·07 [5,892·79, 6,103·71]    | 6,061·99 [5,962·84, 6,192·01]    | 6,209·19 [6,139·21, 6,294·47]    | 6,057·13 [5,975·74, 6,277·47]    | 0·006   |
| <b>Average monthly temperature, (°C)</b>                                | 16·80 [10·20, 22·50]             | 17·80 [8·33, 23·47]              | 16·30 [9·82, 22·70]              | 17·70 [9·60, 23·45]              | 17·20 [10·22, 23·80]             | 16·00 [10·88, 24·80]             | 1·000   |

Note: kg: kilogram; kWh: kilowatt; NA: Not available; tCO<sub>2</sub>e: tonnes of carbon dioxide equivalent; p: p-value

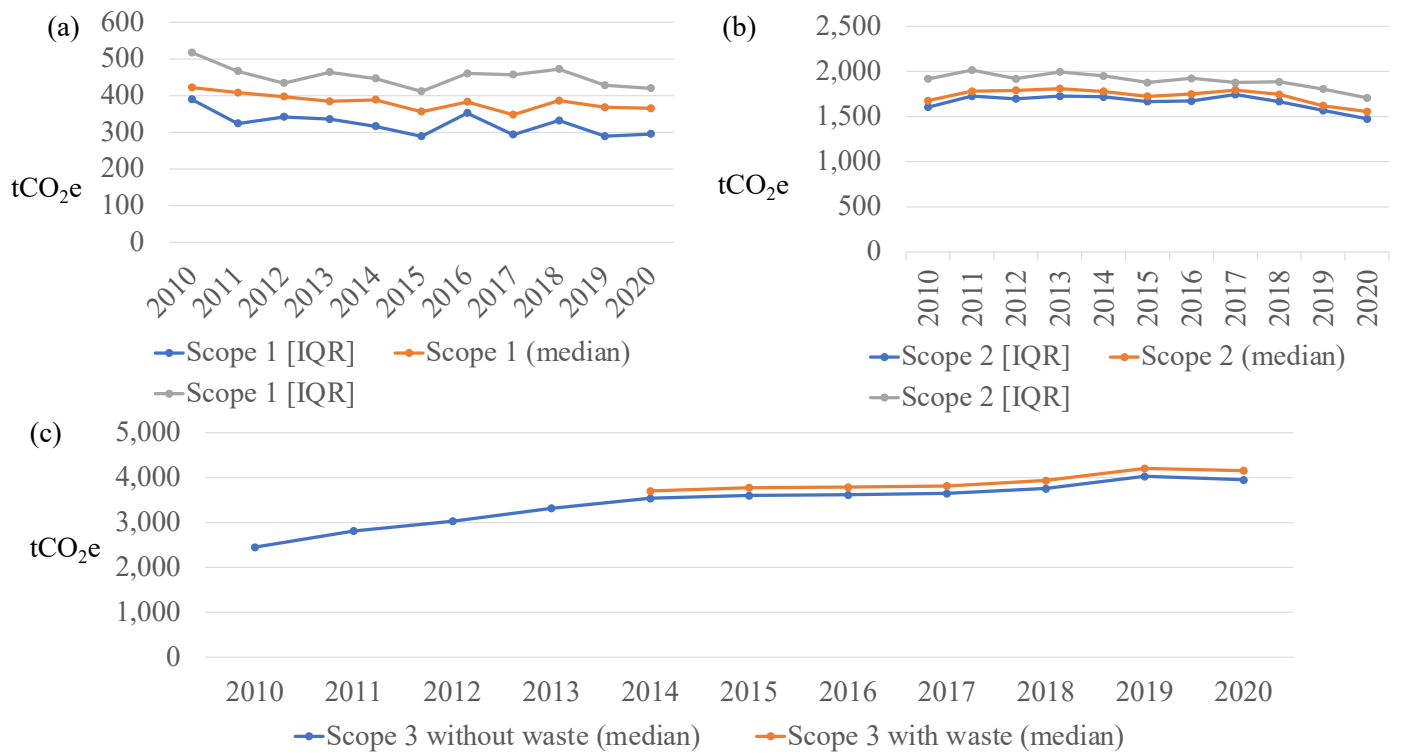

**Additional Figure 1.** Monthly carbon footprint of each emissions scope from 2010 to 2020. (a) Scope 1; (b) scope 2; (c) scope 3 with and without waste. Because the interquartile ranges were too close to the median, only the median values are shown.

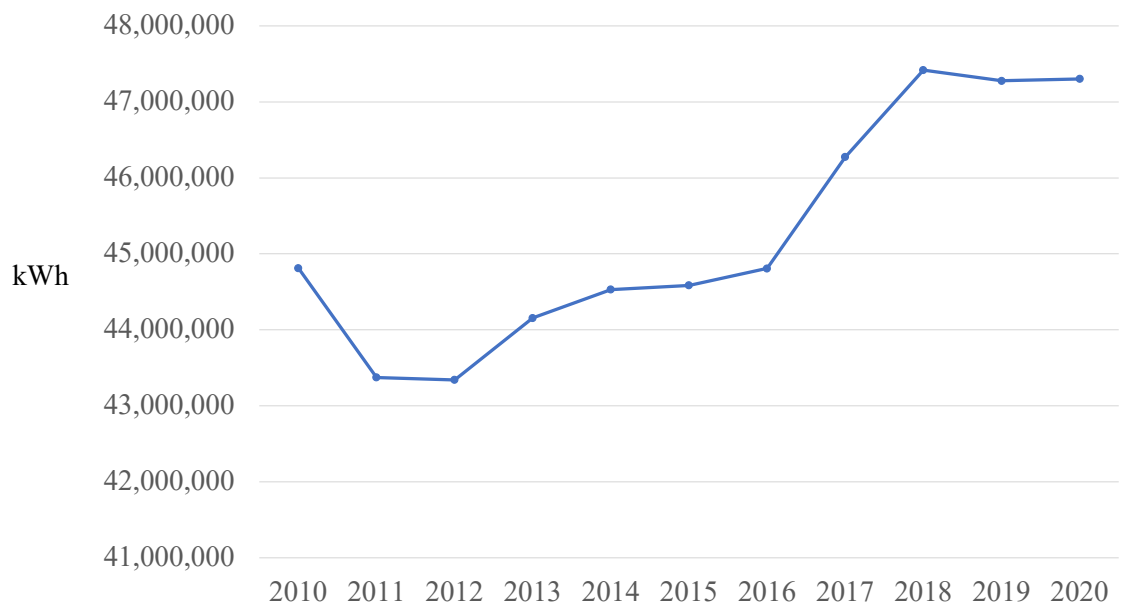

**Additional Figure 2.** Electricity usage from 2010 to 2020.

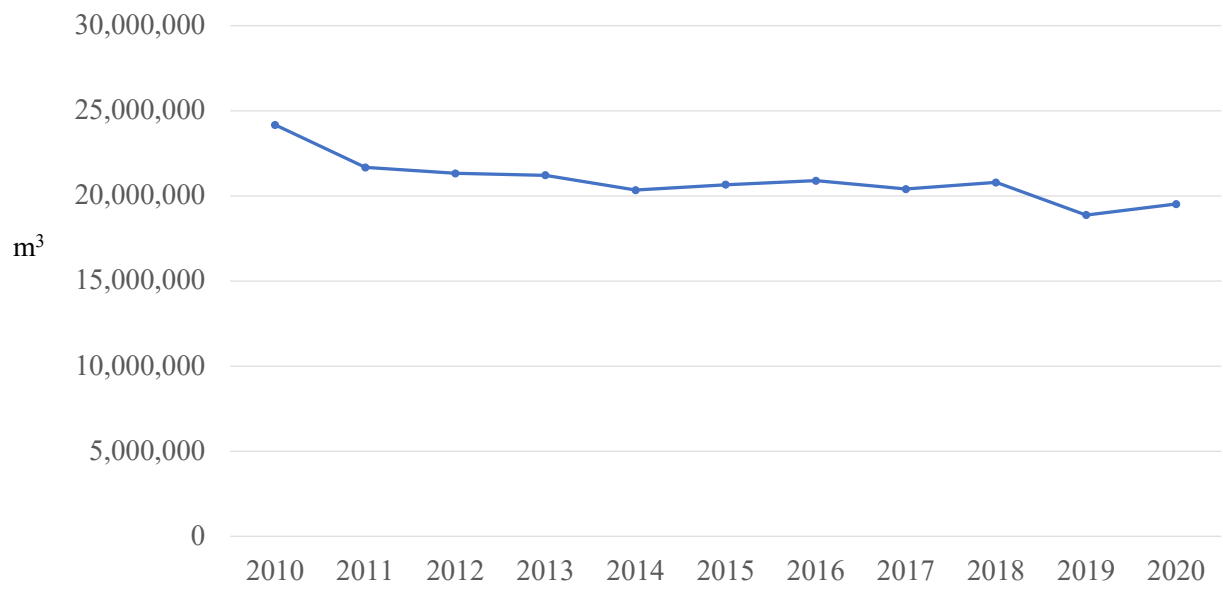

**Additional Figure 3.** Gas usage from 2010 to 2020.



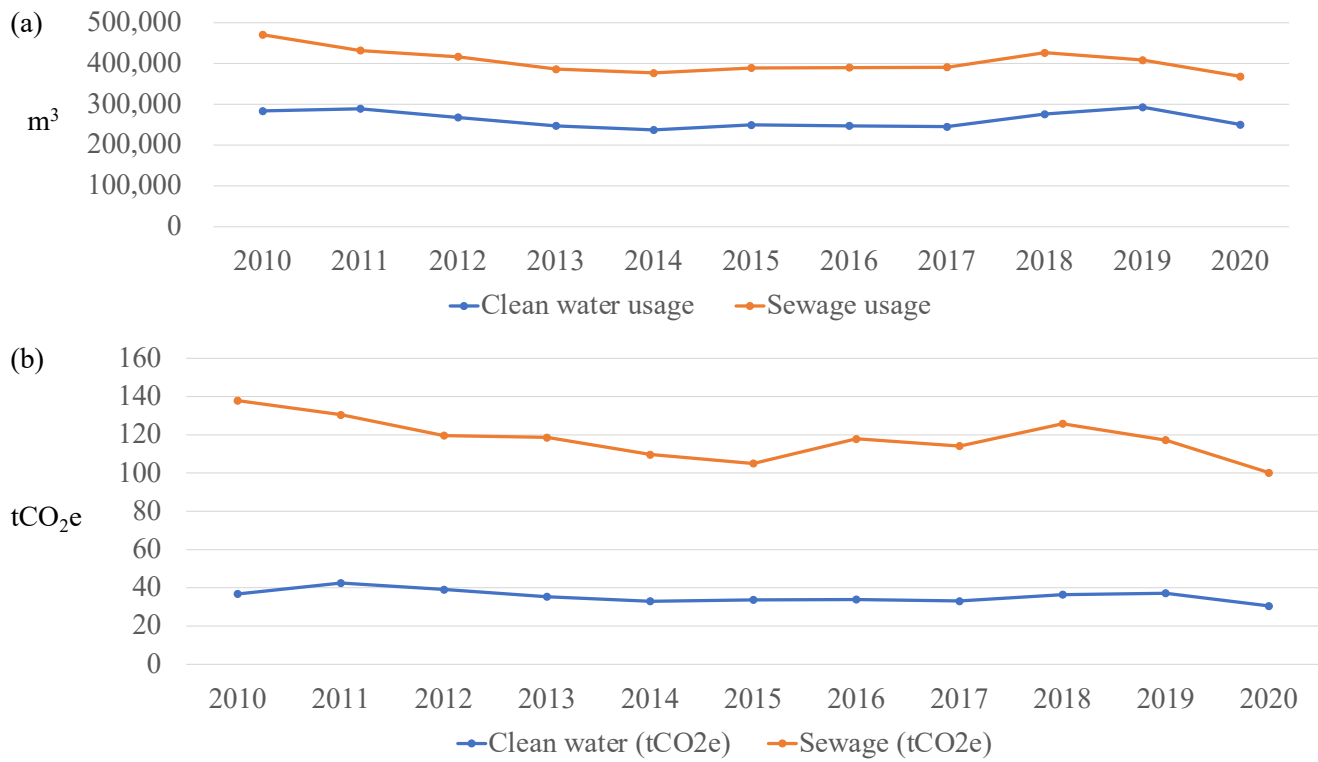

**Additional Figure 4.** Annual usage and carbon footprint of clean water and sewage from 2010 to 2020: (a) usage; (b) carbon footprint

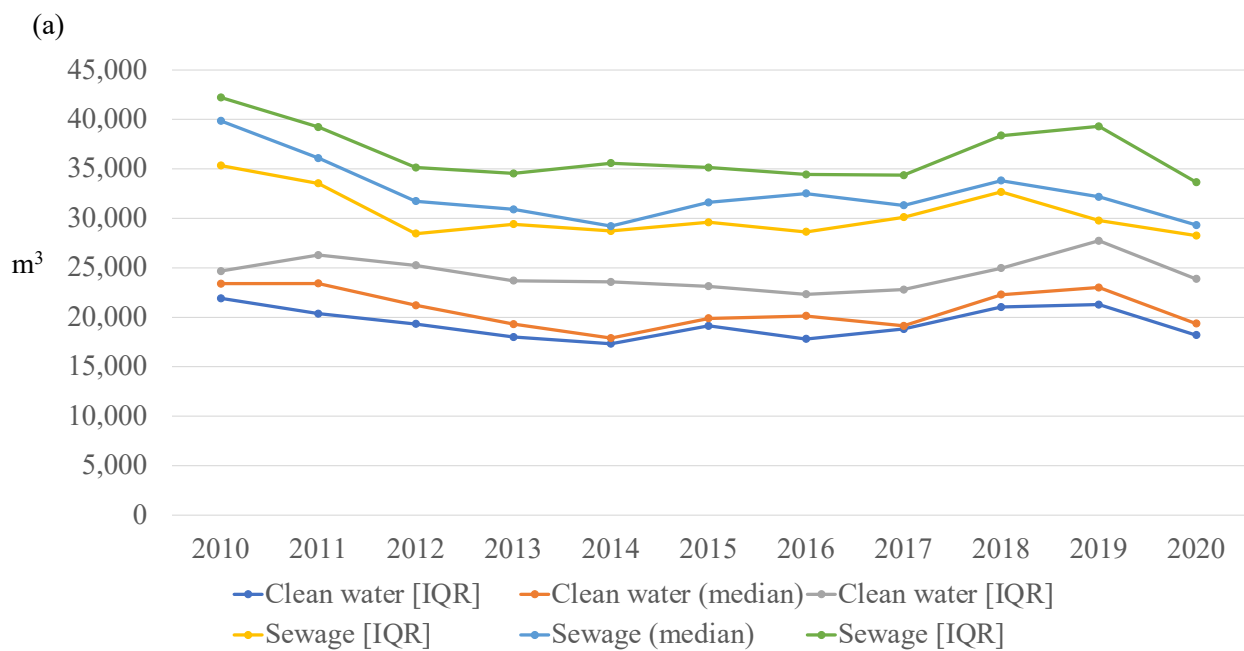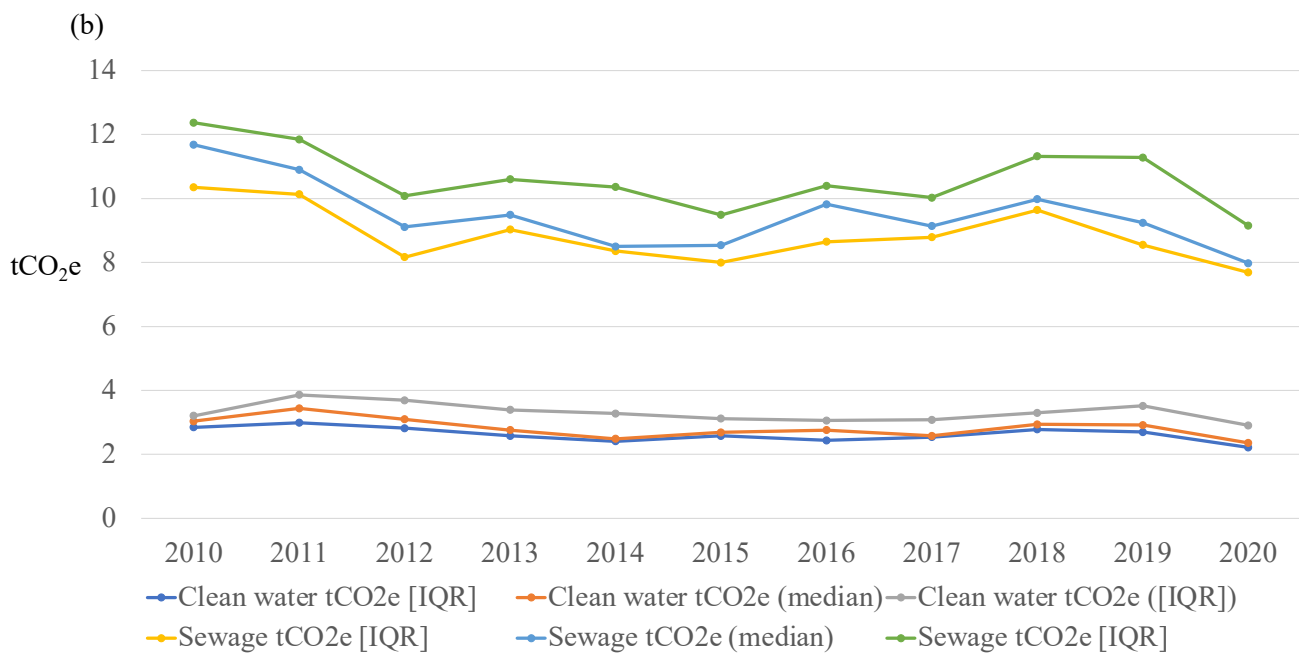

**Additional Figure 5.** Monthly usage and carbon footprint of clean water and sewage from 2010 to 2020: (a) usage; (b) carbon footprint.

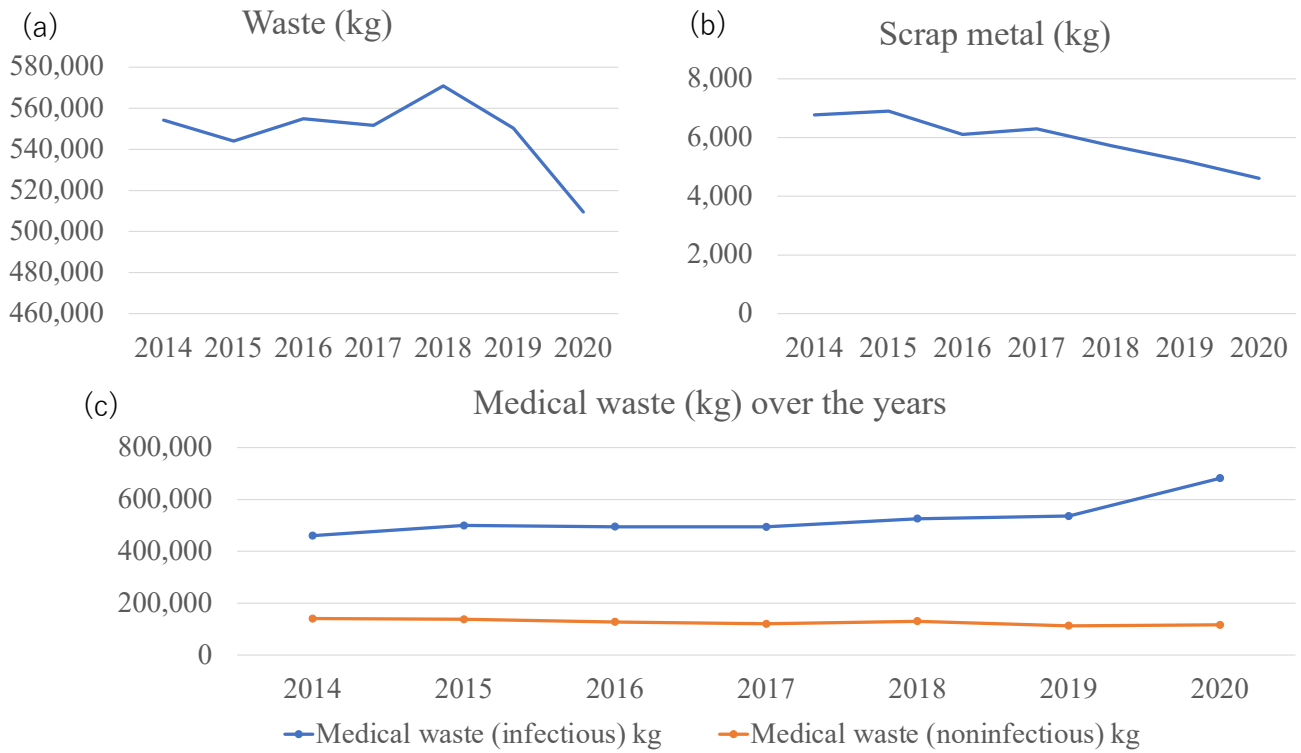

**Additional Figure 6.** Amount of waste (kg) from 2010 to 2020: (a) solid waste; (b) scrap waste; (c) medical waste.

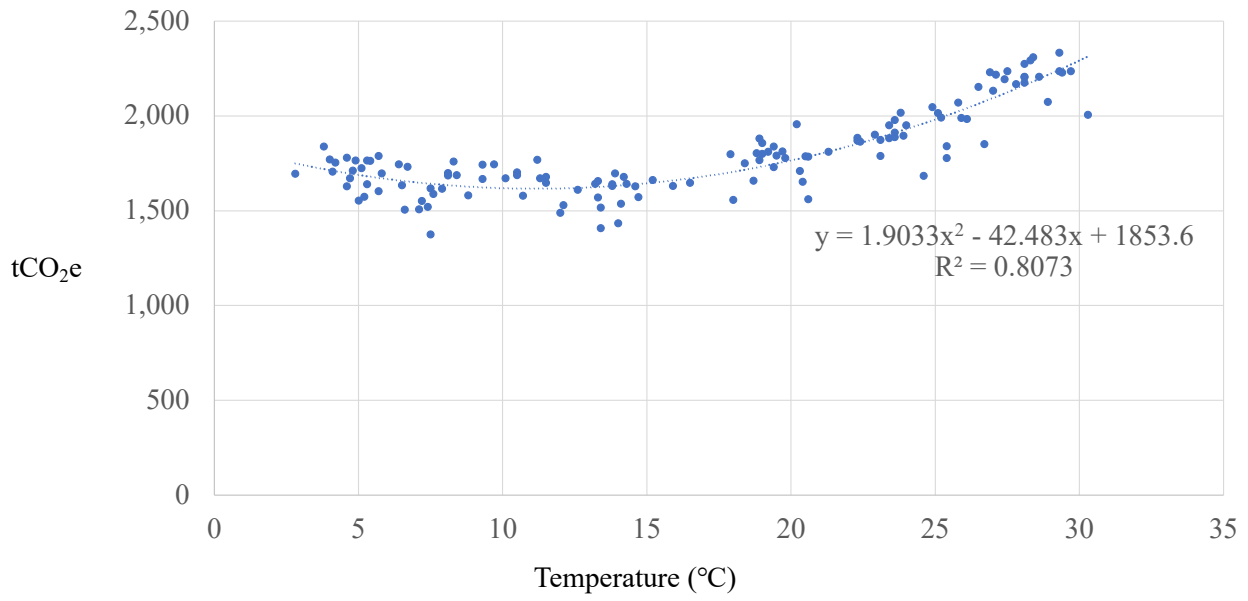

**Additional Figure 7.** Scatter plot and trendline showing the relationship between electricity usage (kWh) and monthly average external temperature from April 2014 to March 2021.

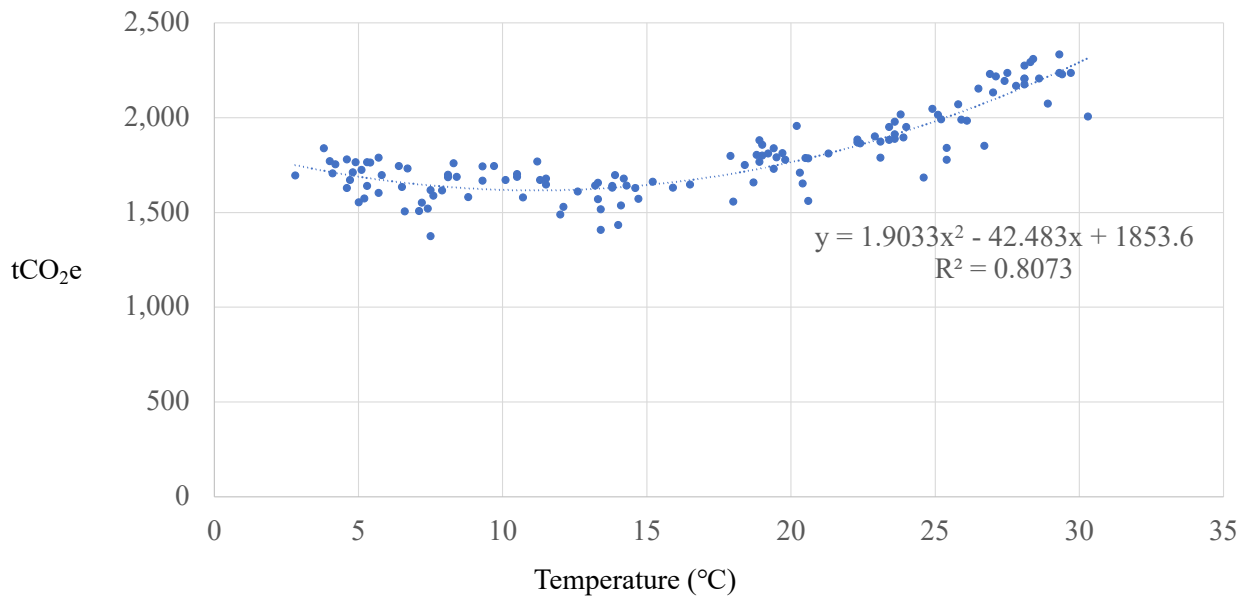

**Additional Figure 8.** Scatter plot and trendline showing the relationship between carbon emissions from electricity usage (tCO<sub>2</sub>e) and monthly average external temperature from April 2010 to March 2021.

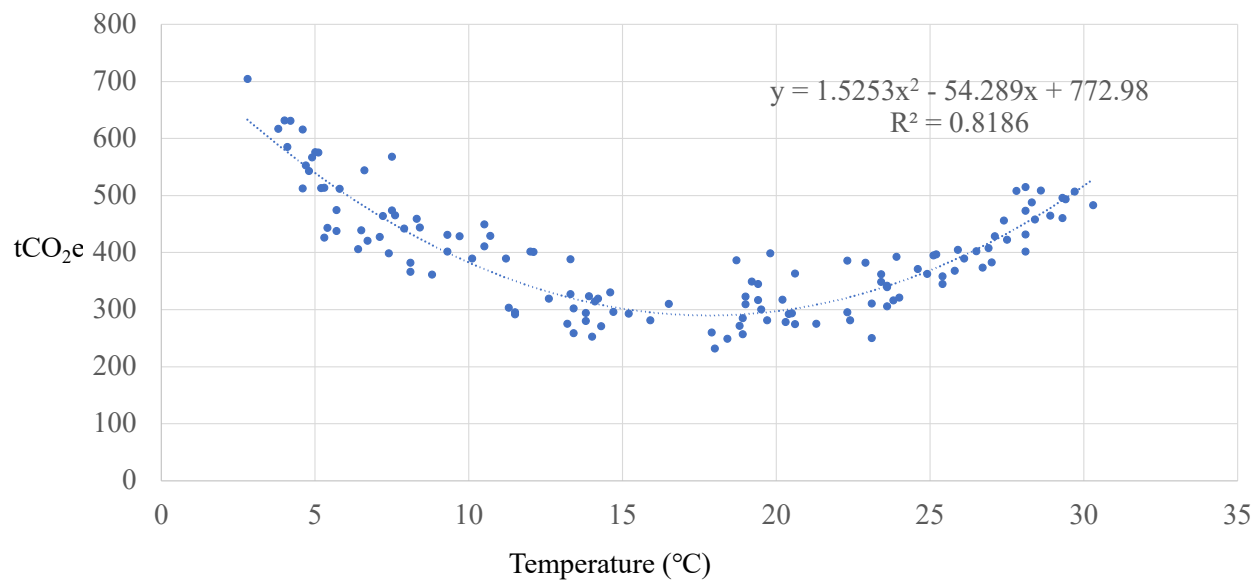

**Additional Figure 9.** Scatter plot and trendline showing the relationship between carbon emissions from gas usage (tCO<sub>2</sub>e) and monthly average external temperature from April 2010 to March 2021.

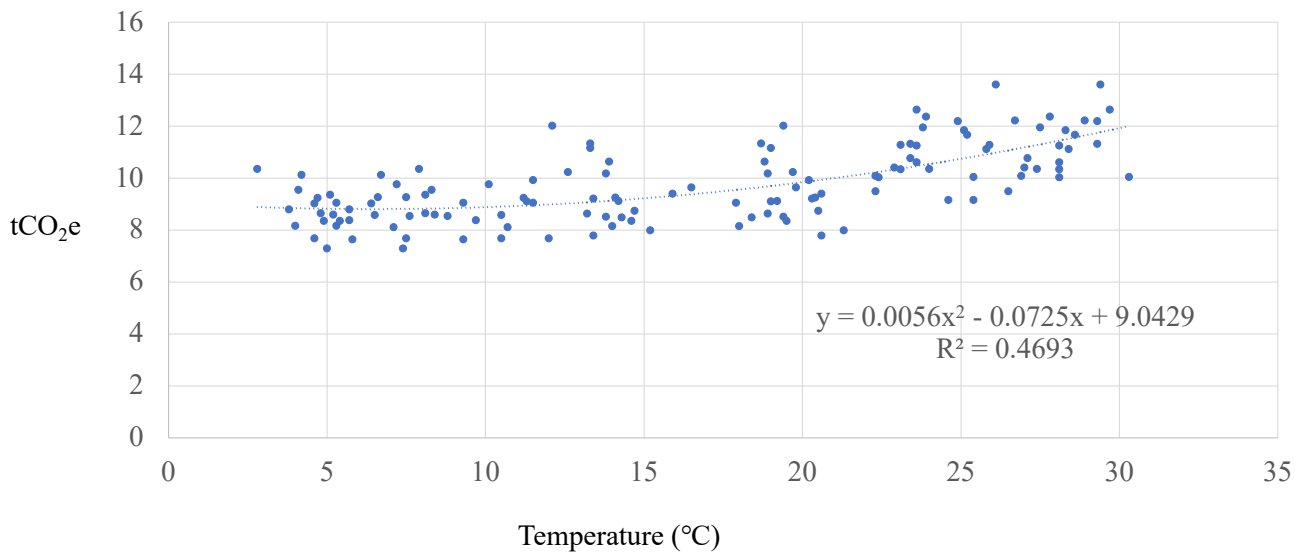

**Additional Figure 10.** Scatter plot and trendline showing the relationship between carbon emissions from sewage usage (tCO<sub>2</sub>e) and monthly average external temperature from April 2010 to March 2021.

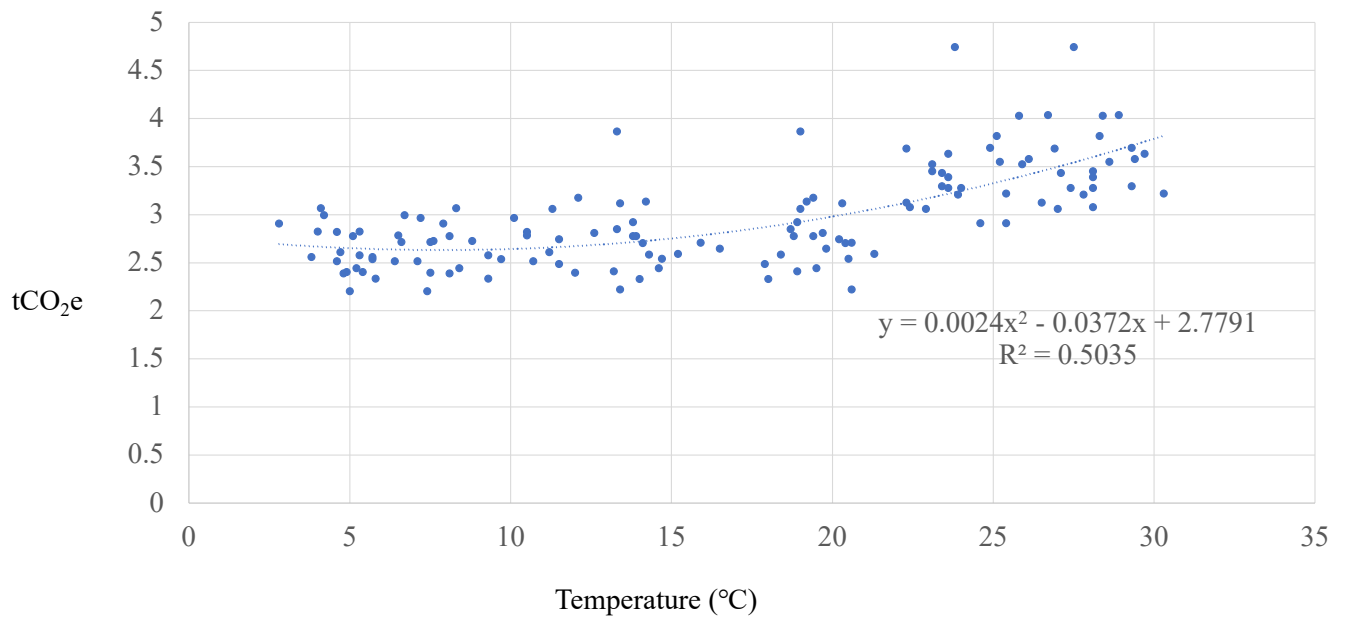

**Additional Figure 11.** Scatter plot and trendline showing the relationship between carbon emissions from clean water usage (tCO<sub>2</sub>e) and monthly average external temperature from April 2010 to March 2021.



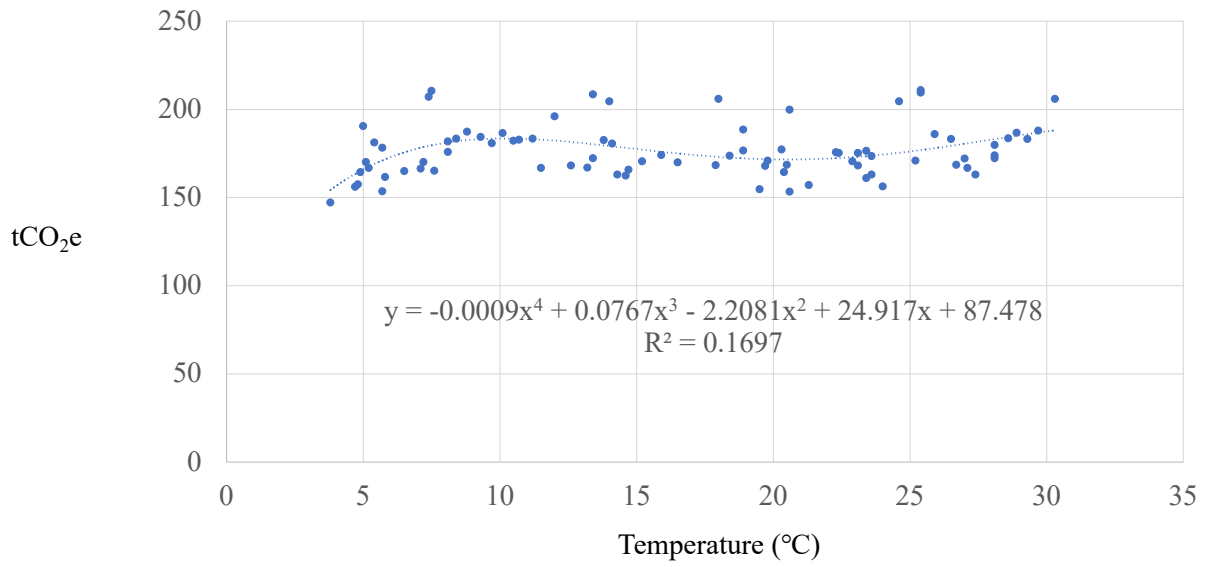

**Additional Figure 12.** Scatter plot and trendline showing the relationship between carbon emissions from waste (tCO<sub>2</sub>e) and temperature from April 2014 to March 2021.

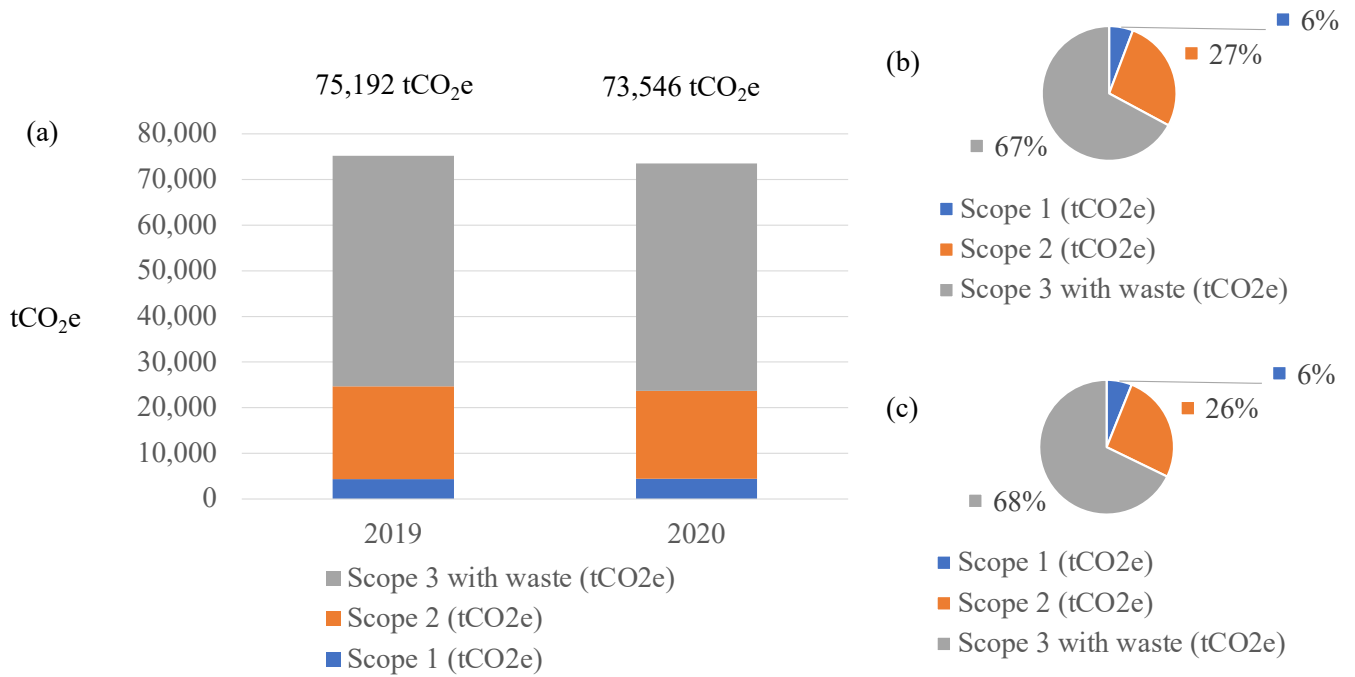

**Additional Figure 13.** (a) Total carbon footprint and (b–c) relative proportions of each emission scope for 2019 and 2020.

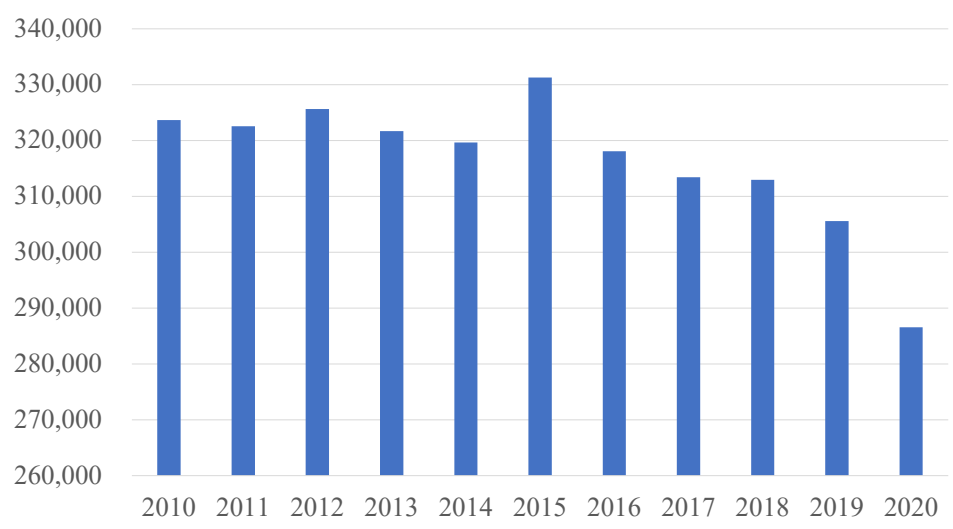

**Additional Figure 14.** Total annual inpatient admissions from 2010 to 2020.

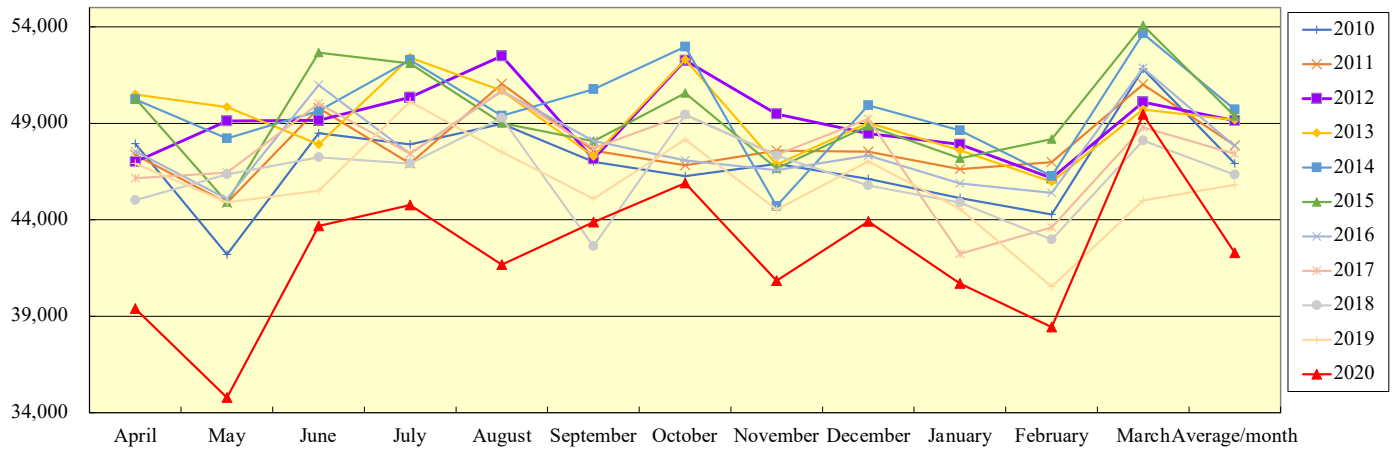

**Additional Figure 15.** Total outpatients per month from 2010 to 2020.

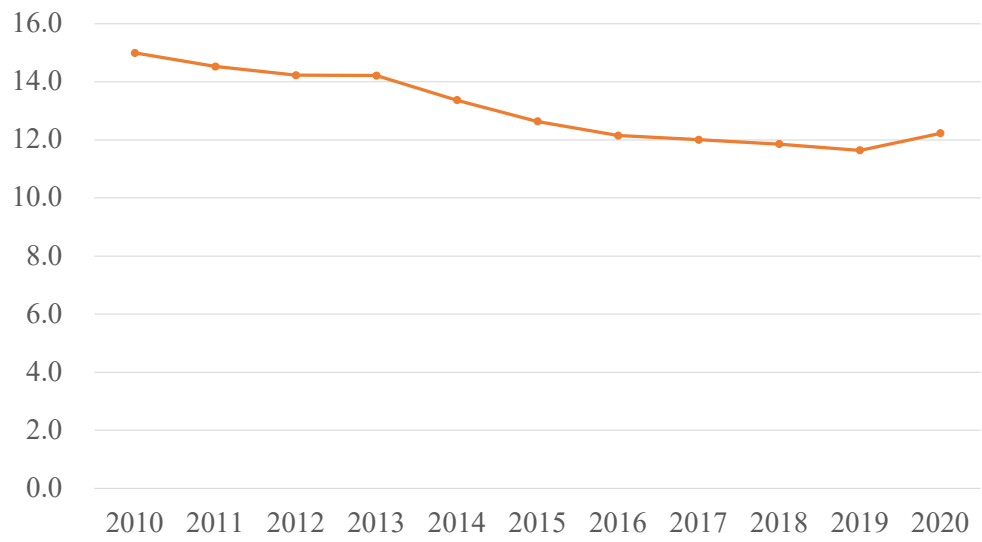

**Additional Figure 16.** Average hospital stay (days) from 2010 to 2020.

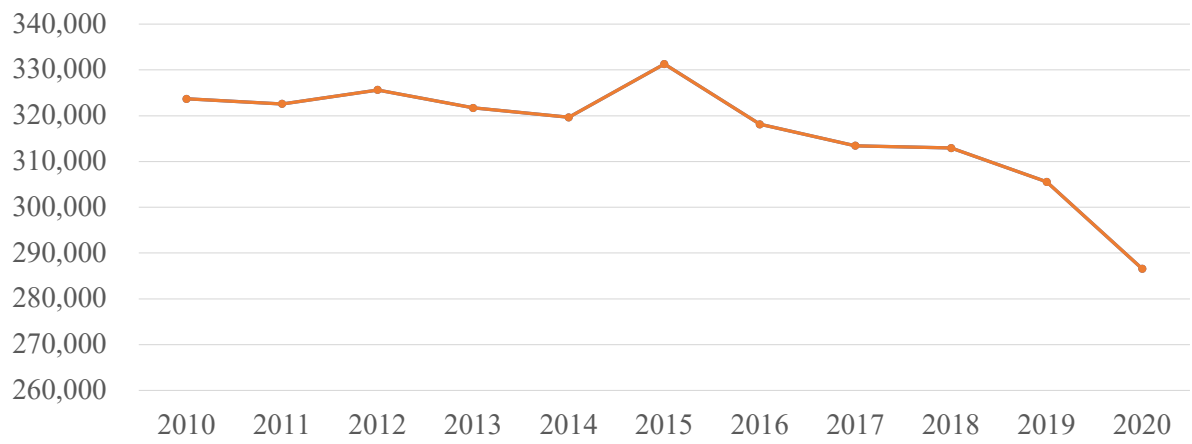

**Additional Figure 17.** Annual number of occupied beds from 2010 to 2020.
